# Supplementary material for: Extracorporeal membrane oxygenation (ECMO) support for acute hypoxemic respiratory failure patients: outcomes and predictive factors
Source: PubMed Central journal article supplement — J Thorac Dis. 2022 Feb;14(2):371–80. doi: 10.21037/jtd-21-1460 (PMC8902121; doi:10.21037/jtd-21-1460), 2022-02
Supplement: jtd-14-02-371-dss.pdf [file jtd-14-02-371-dss.pdf]

## Data Sharing Statement

|                     |                                                                                                                                                    |                                                                                                                                                                                                    |
|---------------------|----------------------------------------------------------------------------------------------------------------------------------------------------|----------------------------------------------------------------------------------------------------------------------------------------------------------------------------------------------------|
| <b>Article Info</b> | https://dx.doi.org/10.21037/jtd-21-1460                                                                                                            |                                                                                                                                                                                                    |
| <b>Item</b>         | <b>Question</b>                                                                                                                                    | <b>Authors' Response<br/>(place "-" if not applicable)</b>                                                                                                                                         |
| 1                   | Would you like to share data collected for your study to others?                                                                                   | Yes                                                                                                                                                                                                |
| 2                   | If not, would you like to share the reason for your decision?                                                                                      | -                                                                                                                                                                                                  |
| 3                   | What data in particular will be shared?                                                                                                            | The anonymized participant data will be made available within three months after the publication of the article. The study protocol and statistical analysis plan are available as an appendix.    |
| 4                   | Any other documents will be share? Such as study protocol, statistical analysis plan, informed consent form, clinical study report, analytic code. | -                                                                                                                                                                                                  |
| 5                   | When will data availability begin?                                                                                                                 | 3 months after publication                                                                                                                                                                         |
| 6                   | When will data availability end?                                                                                                                   | 3 years after publication                                                                                                                                                                          |
| 7                   | To whom will you share the data?                                                                                                                   | Researchers who has planned to conduct a meta-analysis on ECMO support                                                                                                                             |
| 8                   | For what type of analysis or purpose?                                                                                                              | Systematic review or meta-analysis                                                                                                                                                                 |
| 9                   | How or where can the data/documents be obtained?                                                                                                   | Researchers may contact the corresponding author at <a href="mailto:surat.ton@mahidol.ac.th">surat.ton@mahidol.ac.th</a> for data sharing requests, after approval of a planned analysis protocol. |
| 10                  | Any other restrictions?                                                                                                                            | -                                                                                                                                                                                                  |
